# Supplementary material
Source: HighWire-hosted journal article supplement (https://ajnr-sso.highwirestaging.com/highwire/filestream/57674/field_highwire_adjunct_files/0/17-00610.pdf)
Supplement: 17-00610.pdf [file 17-00610.pdf]

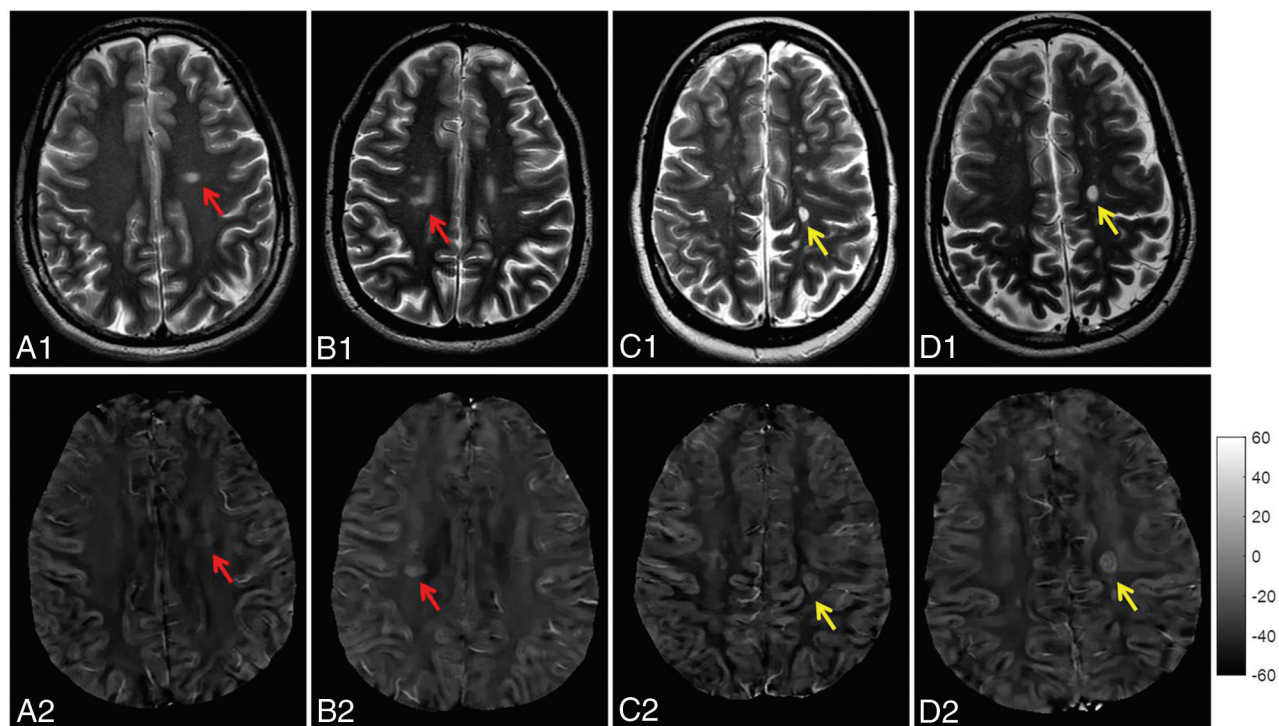

**ON-LINE FIG 1.** Examples of rim- lesions (red arrows): T2-weighted images (A1, B1) and QSM (A2, B2) in 2 patients with relapsing-remitting MS. Examples of rim+ lesions (yellow arrows): T2-weighted images (C1, D1) and QSM (C2, D2) in another 2 patients with relapsing-remitting MS.

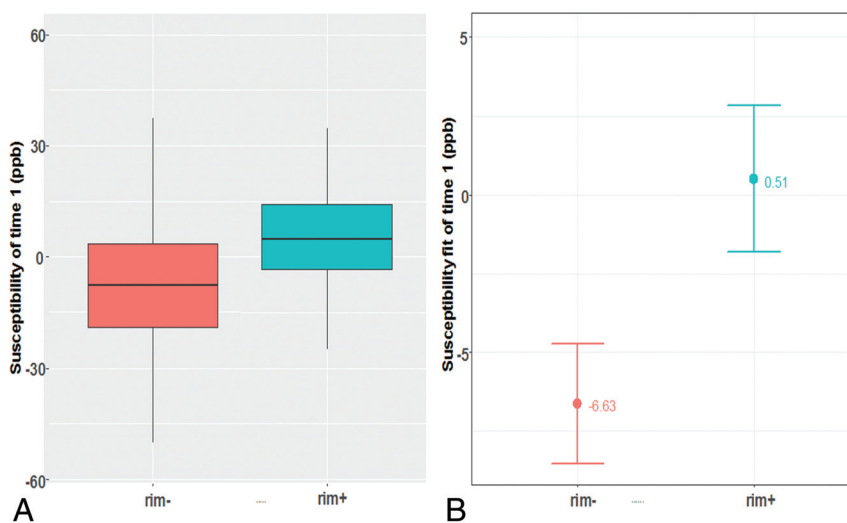

**ON-LINE FIG 2.** A, Boxplot of rim- (pink) and rim+ (blue) lesions, which demonstrates higher QSM in rim+ compared with rim- lesions. B, Confidence interval plot of rim- (pink) and rim+ (blue) lesions derived from a mixed-effects model, which demonstrates higher QSM mean effect in rim+ lesions compared with rim- lesions after controlling for multiple lesions per patient ( $P < .001$ ).

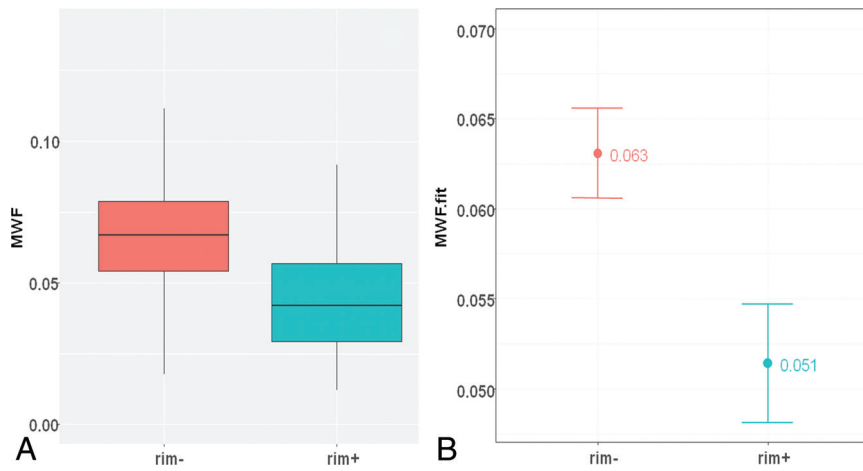

**ON-LINE FIG 3.** A, Boxplot of rim- (pink) and rim+ (blue) lesions, which demonstrates lower MWF in rim+ compared with rim- lesions. B, Confidence interval plot of rim- (pink) and rim+ (blue) lesions derived from a mixed-effects model, which demonstrates a lower MWF mean effect in rim+ lesions compared with rim- lesions after controlling for multiple lesions per patient and T2 lesion size ( $P < .001$  [only include patients without enhanced lesions]).
